# Supplementary material for: Evaluation of Pyrophosphate-Driven Proton Pumps in Saccharomyces cerevisiae under Stress Conditions
Source: MDPI journal article supplement (doi:10.3390/microorganisms12030625), 2024-03-20
Supplement: s1 [file s1]

# Supplementary Data

**Supplementary Table S1:** List of all the primers used for cloning and sequencing in this study.

| Primer Name               | Primer Sequence                                  |
|---------------------------|--------------------------------------------------|
| <b>Cloning Primers</b>    |                                                  |
| 88 – Tc_VP_R              | 5' – ctcacccccccgcgggtg                          |
| 88r – APV1_FW             | 5' – atggttgctccagctttgttgcca                    |
| 89 – Suc2SP_F             | 5' – atgcttttgcaagctttccttttcc                   |
| 90 – KS_Teflp_rev         | 5' – tttgtaattaaaacttagattgctatgctttc            |
| NM_GPDp_SacI_FW_F         | 5' – agctggagctcagtttatcattatca                  |
| NM_CYC7tSdaI_RV_R         | 5' – aacctgcaggtaccggccgcaaattaaagc              |
| 84r – phlu_BamH_F         | 5' – <u>acaggatc</u> catgagtaaaggagaagaacttttcac |
| 85 – phlu_EcoRI_R         | 5' – <u>gcagaattc</u> tattttgtatagttcatccatgcc   |
| <b>Sequencing Primers</b> |                                                  |
| RFP_18_seqADH1t           | 5' – tcgcttatttagaagtgtcaac                      |
| 90r – KS_DeltaTc          | 5' – agaggttcacgtggcg                            |
| 89r – Seq_R_AvpI          | 5' – tctgattctgtgagacataaccagc                   |
| 57 – CYC1_Seq_R           | 5' – gcgtgaatgtaagcgtgac                         |
| NM_CYC7t_REV_R            | 5' – agggcgtgaatgtaagcgtg                        |
| NM_GPDp_FW_F              | 5' – accttctgctctctctgatttgg                     |
| 87r – YFPseq_F            | 5' – cactaccagcagaacac                           |
| LW_262_TDH3p_rev          | 5' – atccgtcgaaaactaagttctgg                     |
| 69r – T7_Seq_F            | 5' – taatacgactcactataggg                        |
| RPF_21_X-4_ver_f          | 5' – cgtgccccaaagctaagagtc                       |
| LW_99_5'GRE3_r_LWA20      | 5' – ctggatgccagcttaaaaag                        |
| RFP_24_XI-3_ver_r         | 5' – cggttgtgatattgttcctgc                       |
| RFP_23_XI-3_ver_f         | 5' – ggccggttattttgtgcttgat                      |

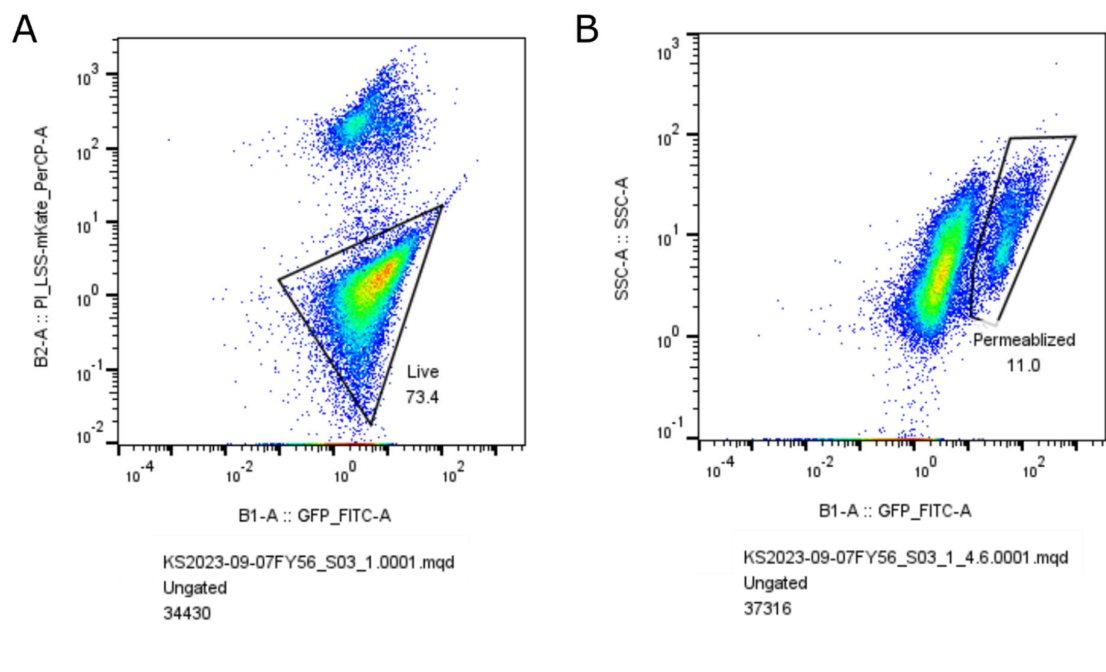

**Supplementary Figure S1:** Gating strategy for cells stained with pHrodo® green. (A) is the gating strategy to obtain the geometric mean of non-permeable stained cells. (B) is the strategy used to obtain the geometric mean of permeabilised cells for making the standard curve.

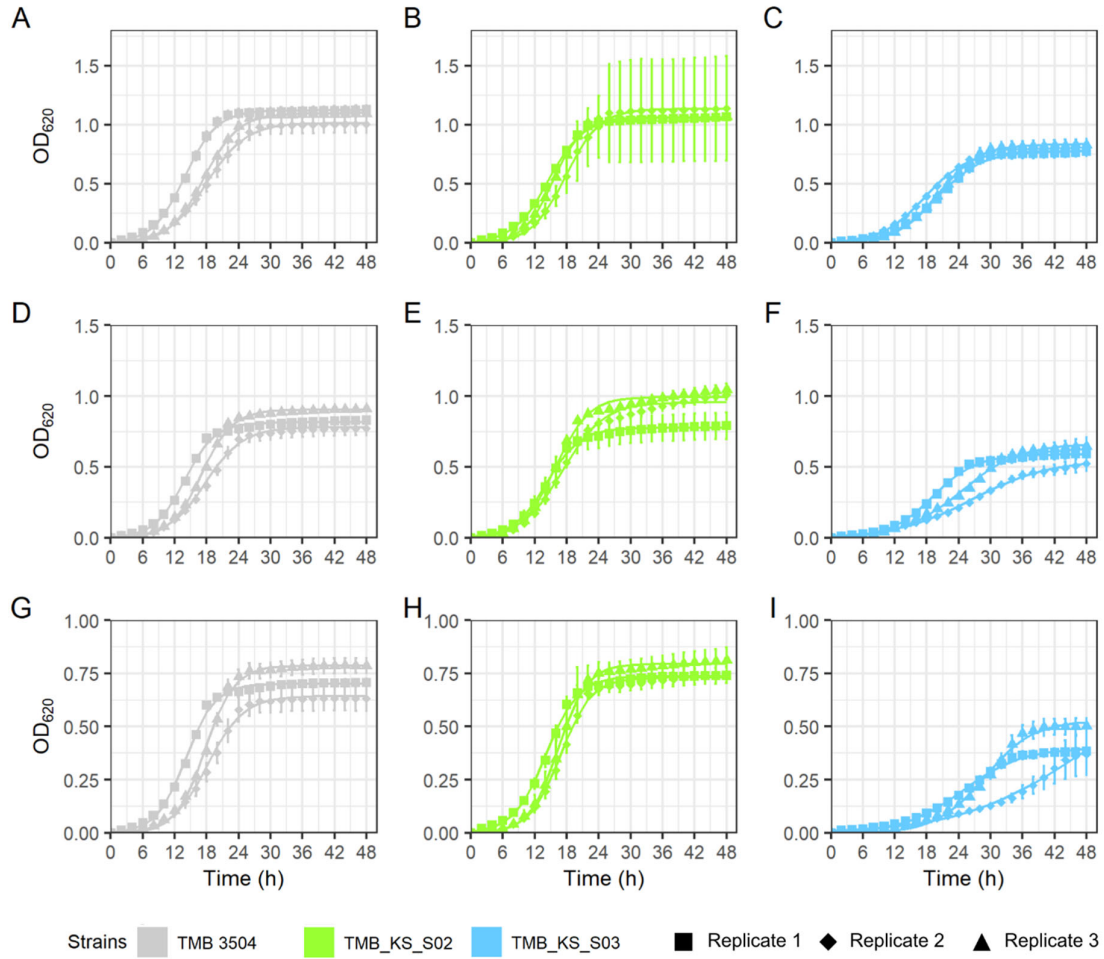

**Supplementary Figure S2:** Growth curves of the three strains without biosensors in mineral media at pH 5 in microtiter plates. (A), (D) and (G) are the growth profiles of TMB 3504 in 0, 3 and 6 g·L<sup>-1</sup> of acetic acid, respectively. (B), (E) and (H) are the growth profiles of TMB\_KS\_S02 in 0, 3 and 6 g·L<sup>-1</sup> of acetic acid, respectively. (C), (F) and (I) are the growth profiles of TMB\_KS\_S03 in 0, 3 and 6 g·L<sup>-1</sup> of acetic acid, respectively. The square, diamond and the triangle shapes are biological replicates with three technical replicates (3 individual wells inoculate from separate colonies obtained from a single clone) represented as standard deviations for each biological replicate. The solid lines are the logistic models fitted through the technical replicates for each biological replicate.

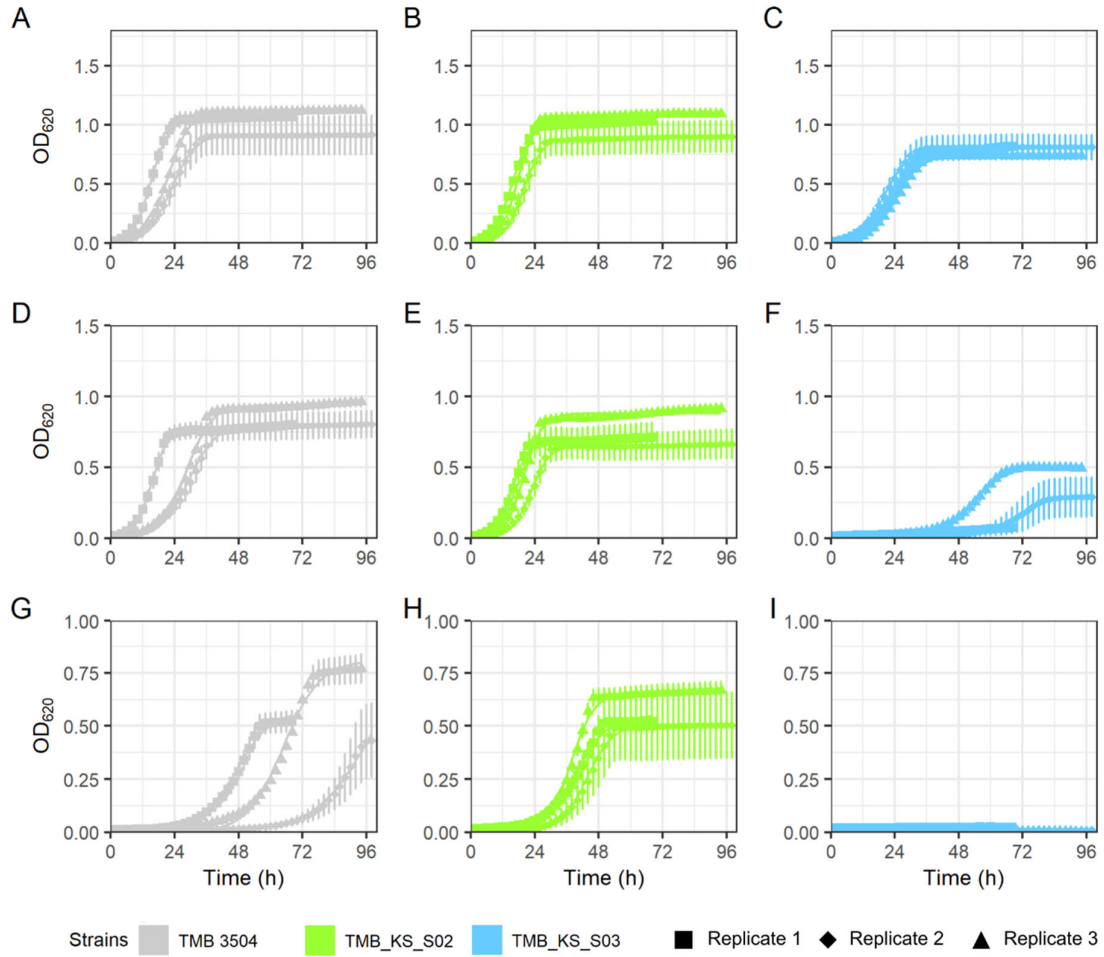

**Supplementary Figure S3:** Growth curves of the three strains without biosensors in mineral media at pH 3.7 in microtiter plates. (A), (D) and (G) are the growth profiles of TMB 3504 in 0, 3 and 6 g·L<sup>-1</sup> of acetic acid, respectively. (B), (E) and (H) are the growth profiles of TMB\_KS\_S02 in 0, 3 and 6 g·L<sup>-1</sup> of acetic acid, respectively. (C), (F) and (I) are the growth profiles of TMB\_KS\_S03 in 0, 3 and 6 g·L<sup>-1</sup> of acetic acid, respectively. The square, diamond and the triangle shapes are biological replicates with three technical replicates (3 individual wells inoculate from separate colonies obtained from a single clone) represented as standard deviations for each biological replicate. The solid lines are the logistic models fitted through the technical replicates for each biological replicate.

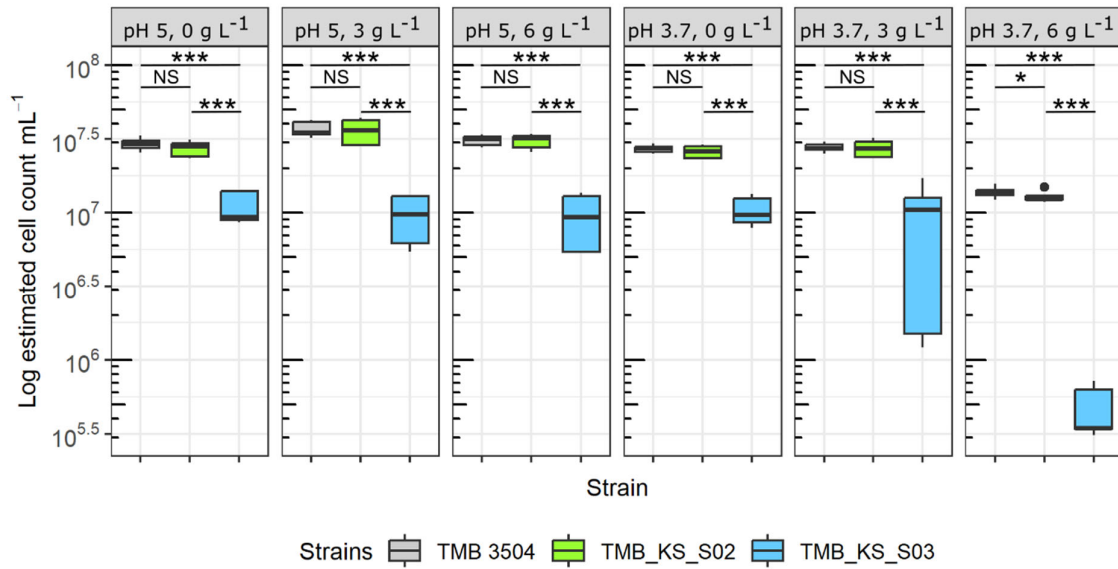

**Supplementary Figure S4:** Estimated log<sub>10</sub> of the total cell count per mL calculated using flow cytometry at the end point for the parent strain (TMB 3504), Vacuolar H<sup>+</sup>-PPase strain (TMB\_KS\_S02) and the cell membrane H<sup>+</sup>-PPase strain (TMB\_KS\_S03) in all the different concentrations of acetic acid in minimal media at different pH 5 and 3.7. [The box represents the quartiles from a combination of technical and biological replicates (9 individual wells), outliers are represented as dots. (NS) represents a p-value greater than 0.1, (\*) represents a p-value between 0.01 and 0.05, (\*\*\*) represents a p-value between 0 and 0.001.] [ANOVA p-values for the various conditions are as follows (pH 5 (0 g·L<sup>-1</sup>, P = 1.56 × 10<sup>-13</sup>; 3 g·L<sup>-1</sup>, P = 3.72 × 10<sup>-12</sup>; 6 g·L<sup>-1</sup>, P = 6.74 × 10<sup>-14</sup>), pH 3.7 (0 g·L<sup>-1</sup>, P = 2.29 × 10<sup>-15</sup>; 3 g·L<sup>-1</sup>, P = 7.55 × 10<sup>-10</sup>; 6 g·L<sup>-1</sup>, P = 2 × 10<sup>-16</sup>)]

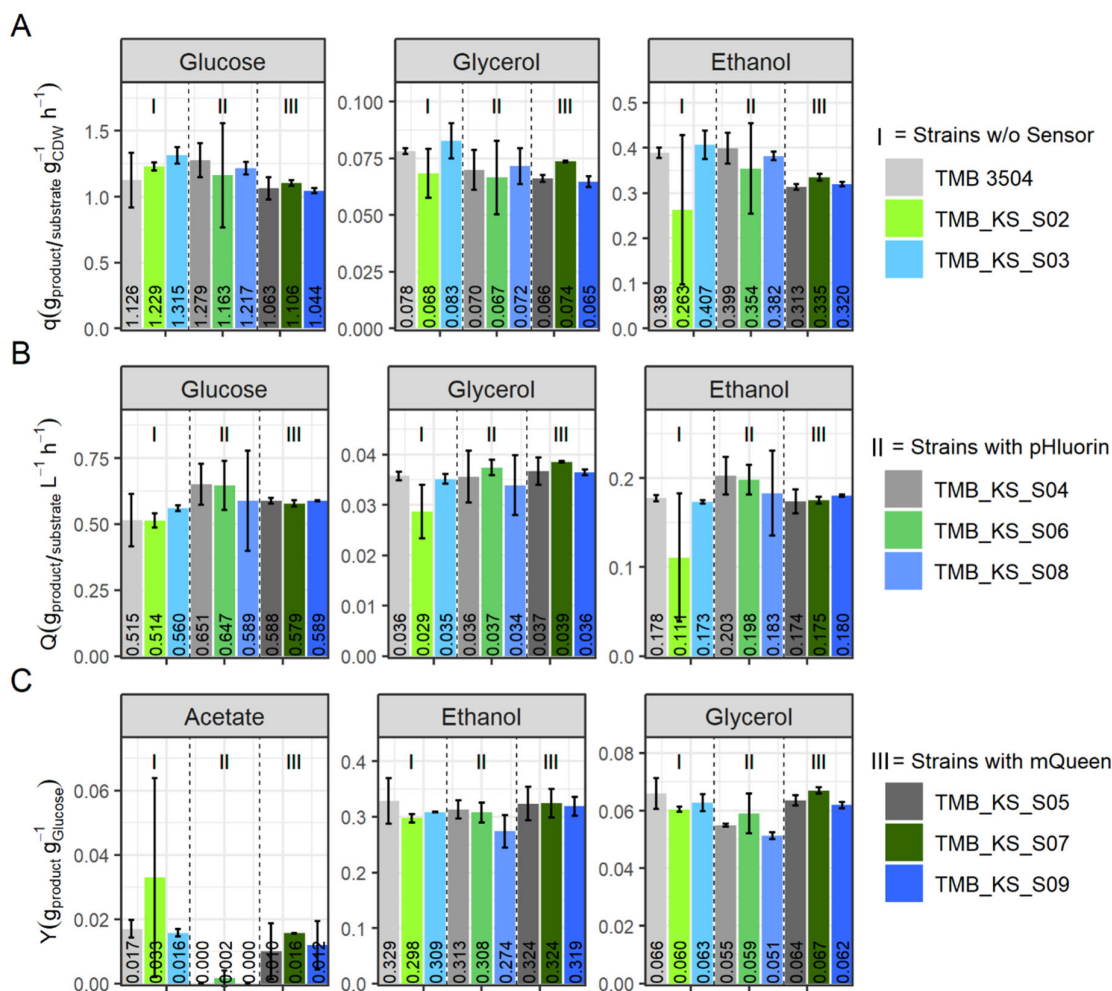

**Supplementary Figure S5:** Specific productivity ( $q$ ), volumetric productivity ( $Q$ ) and yield ( $Y$ ) of the various strains grown in  $20 \text{ g L}^{-1}$  glucose in bioreactors. [Standard deviations between replicates are represented as error bars]. (A) shows the  $q_{\text{xylose}}$ ,  $q_{\text{xylitol}}$  and  $q_{\text{ethanol}}$  calculated during logarithmic growth. (B) shows  $Q_{\text{xylose}}$ ,  $Q_{\text{xylitol}}$  and  $Q_{\text{ethanol}}$  calculated during logarithmic growth. (C) shows the  $Y_{\text{xylose}}$ ,  $Y_{\text{xylitol}}$  and  $Y_{\text{ethanol}}$  calculated for the entire duration of the fermentation. TMB 3504 is the parent strain, and TMB\_KS\_S02 and TMB\_KS\_S03 are its derivatives with the proton pump targeted to the vacuolar and cytosolic membrane, respectively. TMB\_KS\_S04, TMB\_KS\_S06 and TMB\_KS\_S08 are the derivatives of TMB\_3504, TMB\_KS\_S02 and TMB\_KS\_S03, respectively, with the pHluorin biosensor. TMB\_KS\_S05, TMB\_KS\_S07 and TMB\_KS\_S09 are the derivatives of TMB\_3504, TMB\_KS\_S02 and TMB\_KS\_S03, respectively, with the QUEEN-2m biosensor.

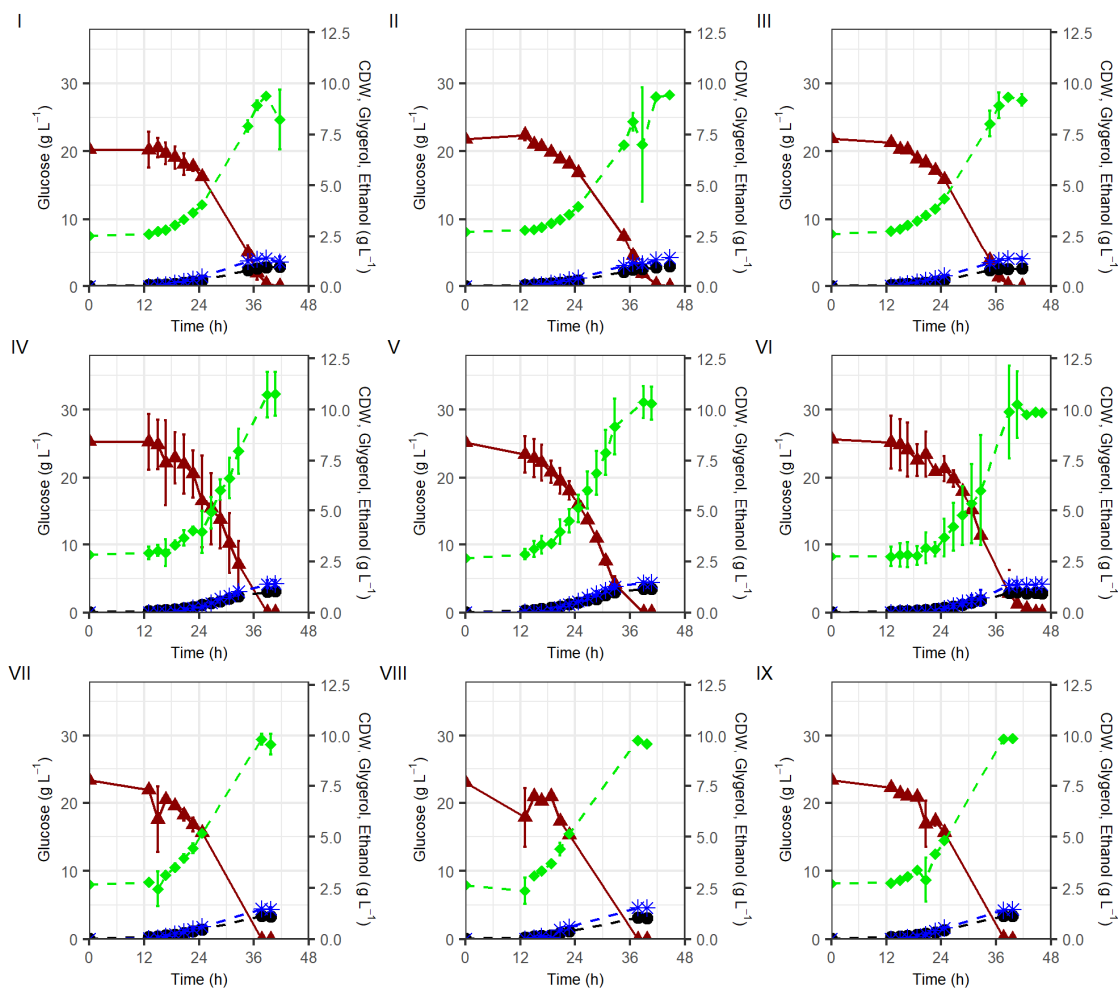

**Supplementary Figure S6:** Metabolic profiles of the strains grown anaerobically on  $20 \text{ g} \cdot \text{L}^{-1}$  glucose. [I] is the parent strain (TMB 3504), [II] is the vacuolar membrane  $\text{H}^{+}$ -PPase strain (TMB\_KS\_S02), [III] is the cell membrane  $\text{H}^{+}$ -PPase strain (TMB\_KS\_S03), [IV] is the parent strain with pHluorin (TMB\_KS\_S04), [V] is the vacuolar membrane  $\text{H}^{+}$ -PPase strain with pHluorin (TMB\_KS\_S06), [VI] is the cell membrane  $\text{H}^{+}$ -PPase strain with pHluorin (TMB\_KS\_S08), [VII] is the parent strain with mQueen (TMB\_KS\_S05), [VIII] is the vacuolar membrane  $\text{H}^{+}$ -PPase strain with mQueen (TMB\_KS\_S07), [IX] is the cell membrane  $\text{H}^{+}$ -PPase strain with mQueen (TMB\_KS\_S09). Triangle (dark red continuous line) glucose; Diamond (dark green, dashed line) ethanol; asterisk (blue, dashed line) glycerol, circle (black, dashed line) cell dry weight. The error bars are the standard deviations obtained from biological duplicates.

**Supplementary Table S2:** Carbon and redox balances for all anaerobic fermentations on glucose and xylose conducted in 1-L working volumes in 3 L Applikon bioreactors.

|                   | <i>Glucose</i> |               | <i>Xylose</i>  |               |
|-------------------|----------------|---------------|----------------|---------------|
|                   | Carbon balance | Redox Balance | Carbon balance | Redox Balance |
| <i>TMB 3504</i>   | 1.007 ± 0.149  | 1.009 ± 0.140 | 1.035 ± 0.031  | 1.031 ± 0.020 |
| <i>TMB_KS_S02</i> | 0.951 ± 0.049  | 0.956 ± 0.044 | 0.993 ± 0.011  | 1.007 ± 0.039 |
| <i>TMB_KS_S03</i> | 0.938 ± 0.088  | 0.945 ± 0.083 | 0.980 ± 0.021  | 0.985 ± 0.029 |
| <i>TMB_KS_S04</i> | 0.898 ± 0.079  | 0.907 ± 0.070 | 1.034 ± 0.021  | 1.035 ± 0.017 |
| <i>TMB_KS_S05</i> | 0.892 ± 0.106  | 0.901 ± 0.094 | 0.995 ± 0.006  | 0.992 ± 0.010 |
| <i>TMB_KS_S06</i> | 0.903 ± 0.091  | 0.911 ± 0.094 | 0.987 ± 0.011  | 0.991 ± 0.022 |
| <i>TMB_KS_S07</i> | 0.950 ± 0.100  | 0.954 ± 0.090 | 1.007 ± 0.018  | 1.001 ± 0.025 |
| <i>TMB_KS_S08</i> | 0.880 ± 0.067  | 0.890 ± 0.060 | 1.053 ± 0.037  | 1.048 ± 0.033 |
| <i>TMB_KS_S09</i> | 0.938 ± 0.110  | 0.941 ± 0.100 | N.D.           | N.D.          |

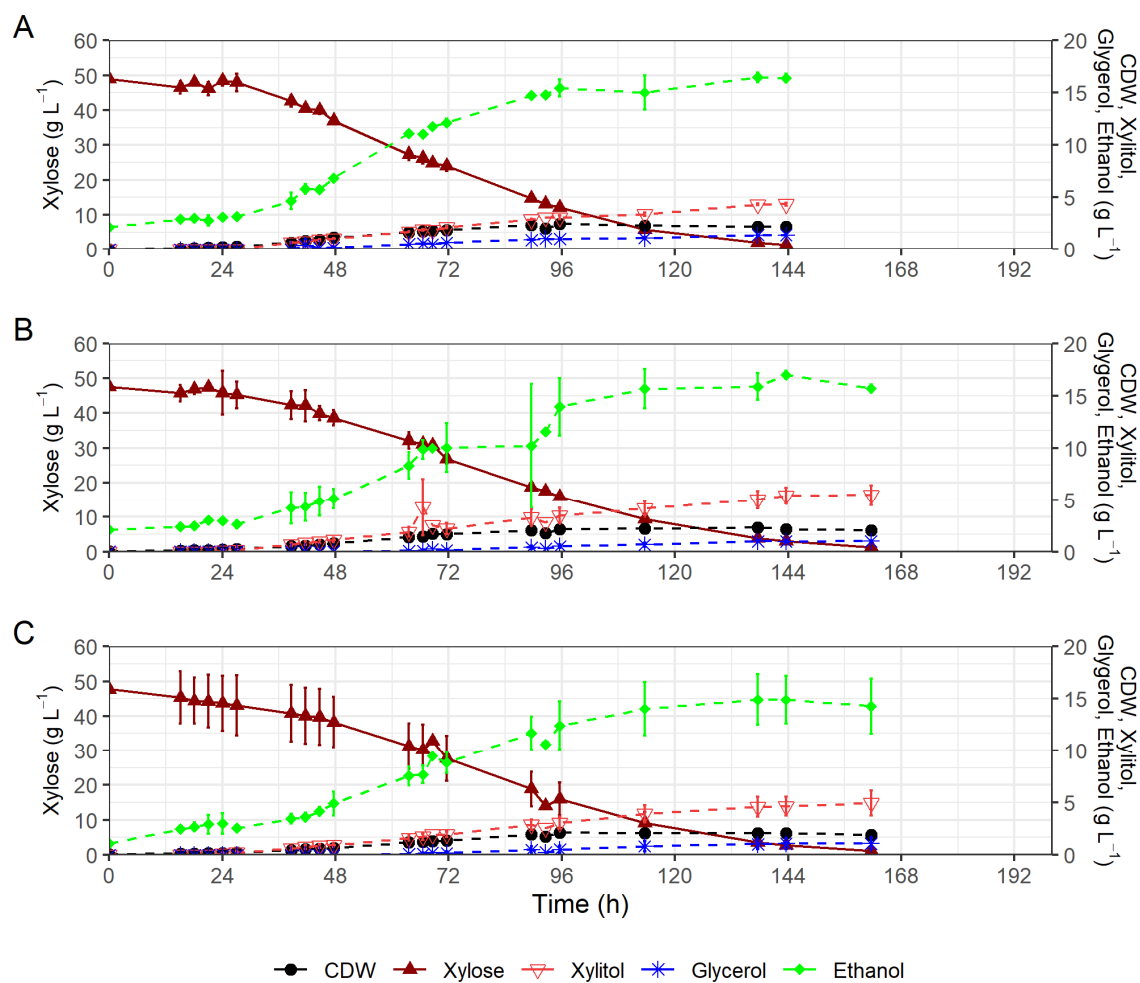

**Supplementary Figure S7:** Metabolic profiles of the strains grown anaerobically on 50 g·L<sup>-1</sup> xylose. (A) is the parent strain (TMB 3504), (B) is the vacuolar membrane H<sup>+</sup>-PPase strain (TMB\_KS\_S02), (C) is the cell membrane H<sup>+</sup>-PPase strain (TMB\_KS\_S03). Triangle (dark red continuous line) xylose; inverted triangle (brown, dashed line, no fill) xylitol; diamond (green, dashed line) ethanol; asterisk (blue, dashed line) glycerol, circle (black, dashed line) cell dry weight. The error bars are the standard deviations obtained from biological duplicates.

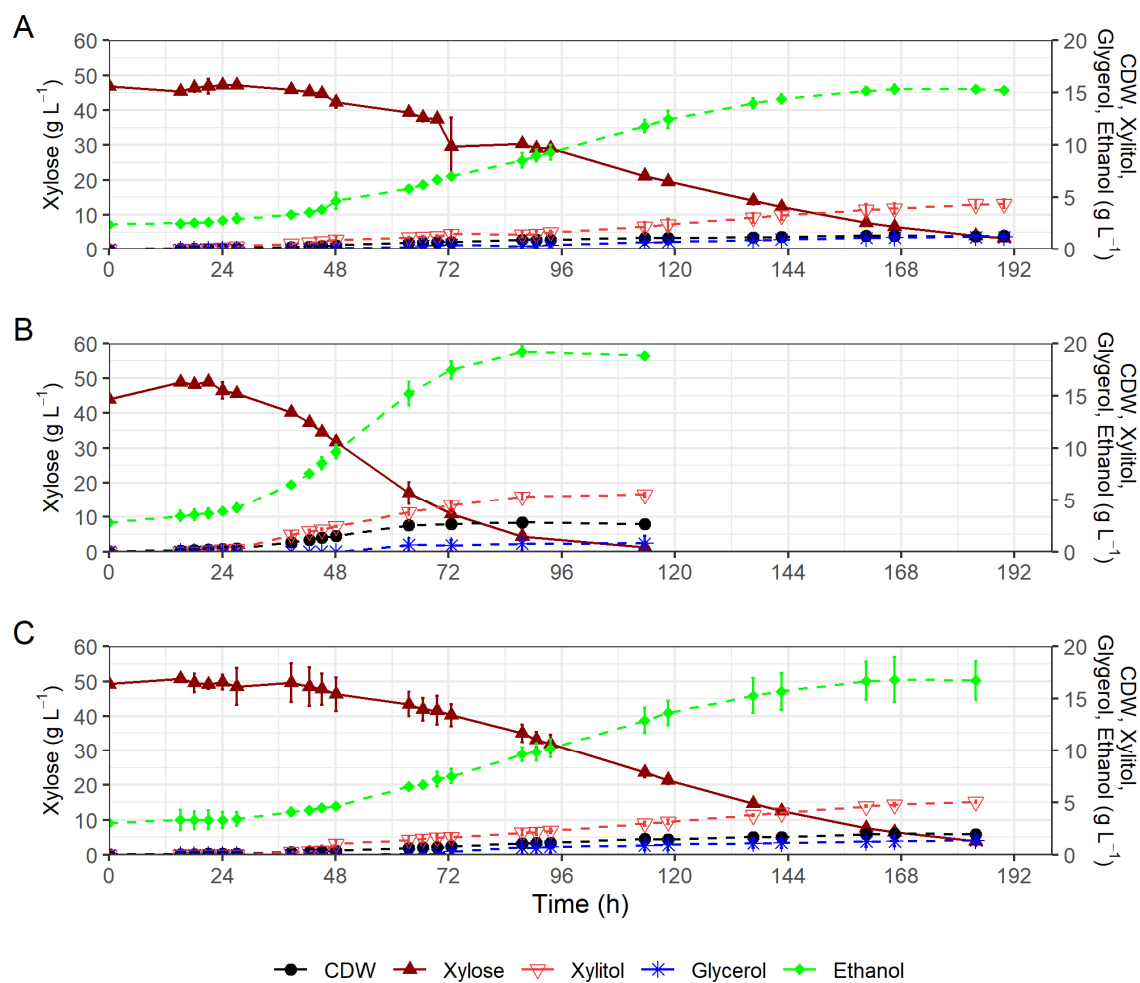

**Supplementary Figure S8:** Metabolic profiles of the strains grown anaerobically on 50 g·L<sup>-1</sup> xylose. (A) is the parent strain with pHluorin (TMB\_KS\_S04), (B) is the vacuolar membrane H<sup>+</sup>-PPase strain with pHluorin (TMB\_KS\_S06), (C) is the cell membrane H<sup>+</sup>-PPase strain with pHluorin (TMB\_KS\_S08). Triangle (dark red continuous line) xylose; inverted triangle (brown, dashed line, no fill) xylitol; diamond (green, dashed line) ethanol; asterix (blue, dashed line) glycerol; circle (black, dashed line) cell dry weight. The error bars are the standard deviations obtained from biological duplicates.

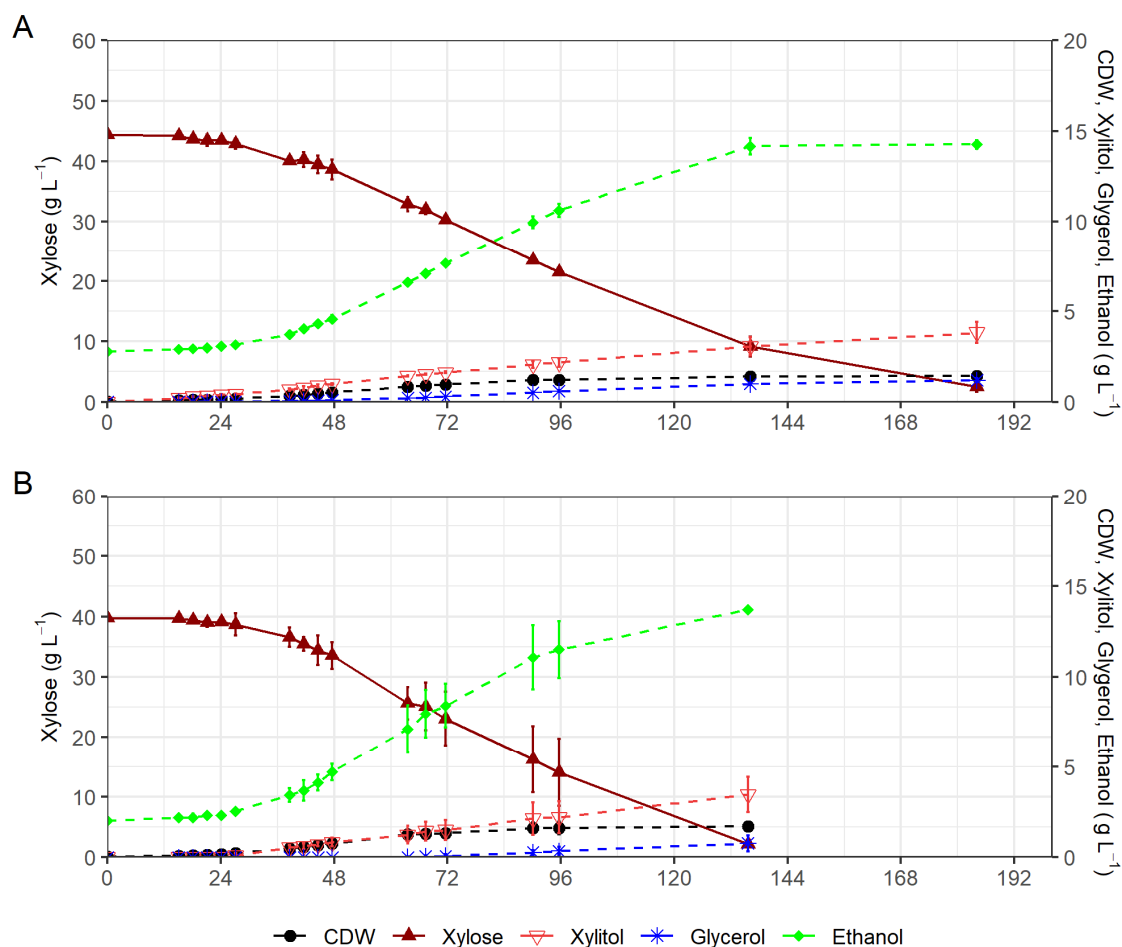

**Supplementary Figure S9:** Metabolic profiles of the strains grown anaerobically on  $50 \text{ g} \cdot \text{L}^{-1}$  xylose. (A) is the parent strain with mQueen (TMB\_KS\_S05), (B) is the vacuolar membrane  $\text{H}^+$ -PPase strain with mQueen (TMB\_KS\_S07). Triangle (dark red continuous line) xylose; inverted triangle (brown, dashed line, no fill) xylitol; diamond (green, dashed line) ethanol; asterisk (blue, dashed line) glycerol, circle (black, dashed line) cell dry weight. The error bars are the standard deviations obtained from biological duplicates.

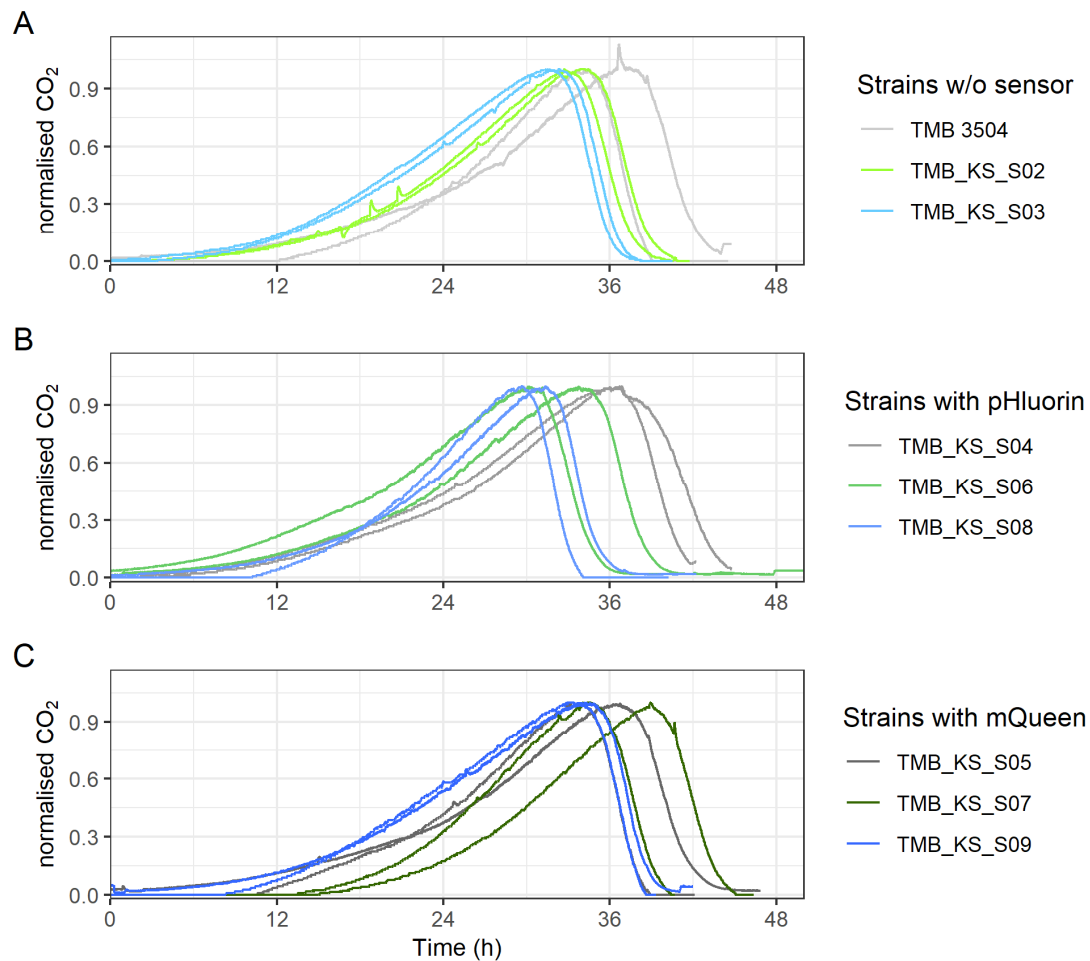

**Supplementary Figure S10:** Time course of the carbon dioxide production profiles for the biological duplicates for all fermentations on 20 g·L<sup>-1</sup> glucose. Data is normalised to the highest value within their respective fermentations. [A] The parent strain, The vacuolar membrane H<sup>+</sup>-PPase strain and the cell membrane H<sup>+</sup>-PPase strain, [B] the derivatives of [A] with pHluorin biosensor, [C] derivatives of [A] with mQueen biosensor.

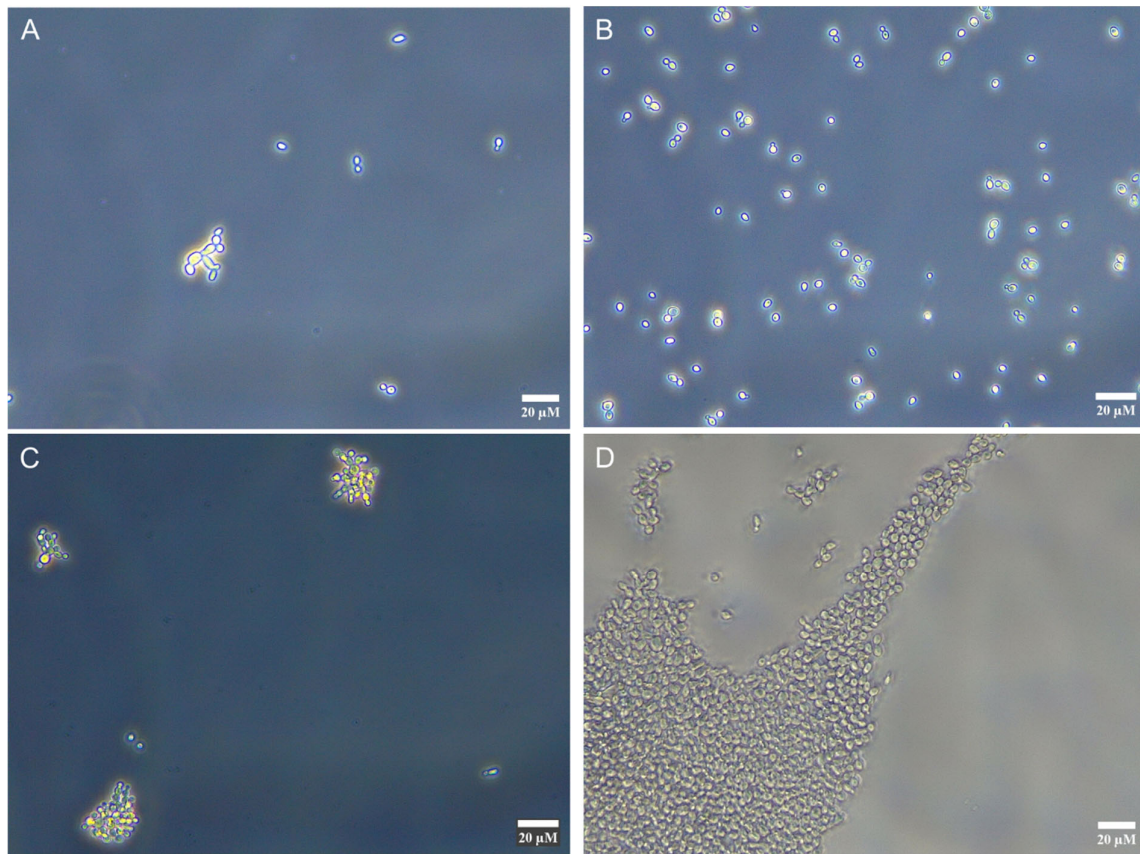

**Supplementary Figure S11:** Phase contrast micrographs at 40X magnification of the strains with pHluorin biosensor. Images taken during logarithmic growth. (A) Parent strain with pHluorin (TMB\_KS\_S04), (B) Vacuolar  $H^+$ -PPase strain with pHluorin (TMB\_KS\_S06), (C) Cell membrane  $H^+$ -PPase strain with pHluorin (TMB\_KS\_S08) and (D) Parent strain with mQueen (TMB\_KS\_S05).
